# Supplementary material for: Penicillium citrinum Provides Transkingdom Growth Benefits in Choy Sum (Brassica rapa var. parachinensis)
Source: MDPI journal article supplement (doi:10.3390/jof9040420), 2023-03-29
Supplement: s1 [file s1]

Supplementary Figure S1

Morphometric, and taxonomic identification of beneficial fungal isolates.

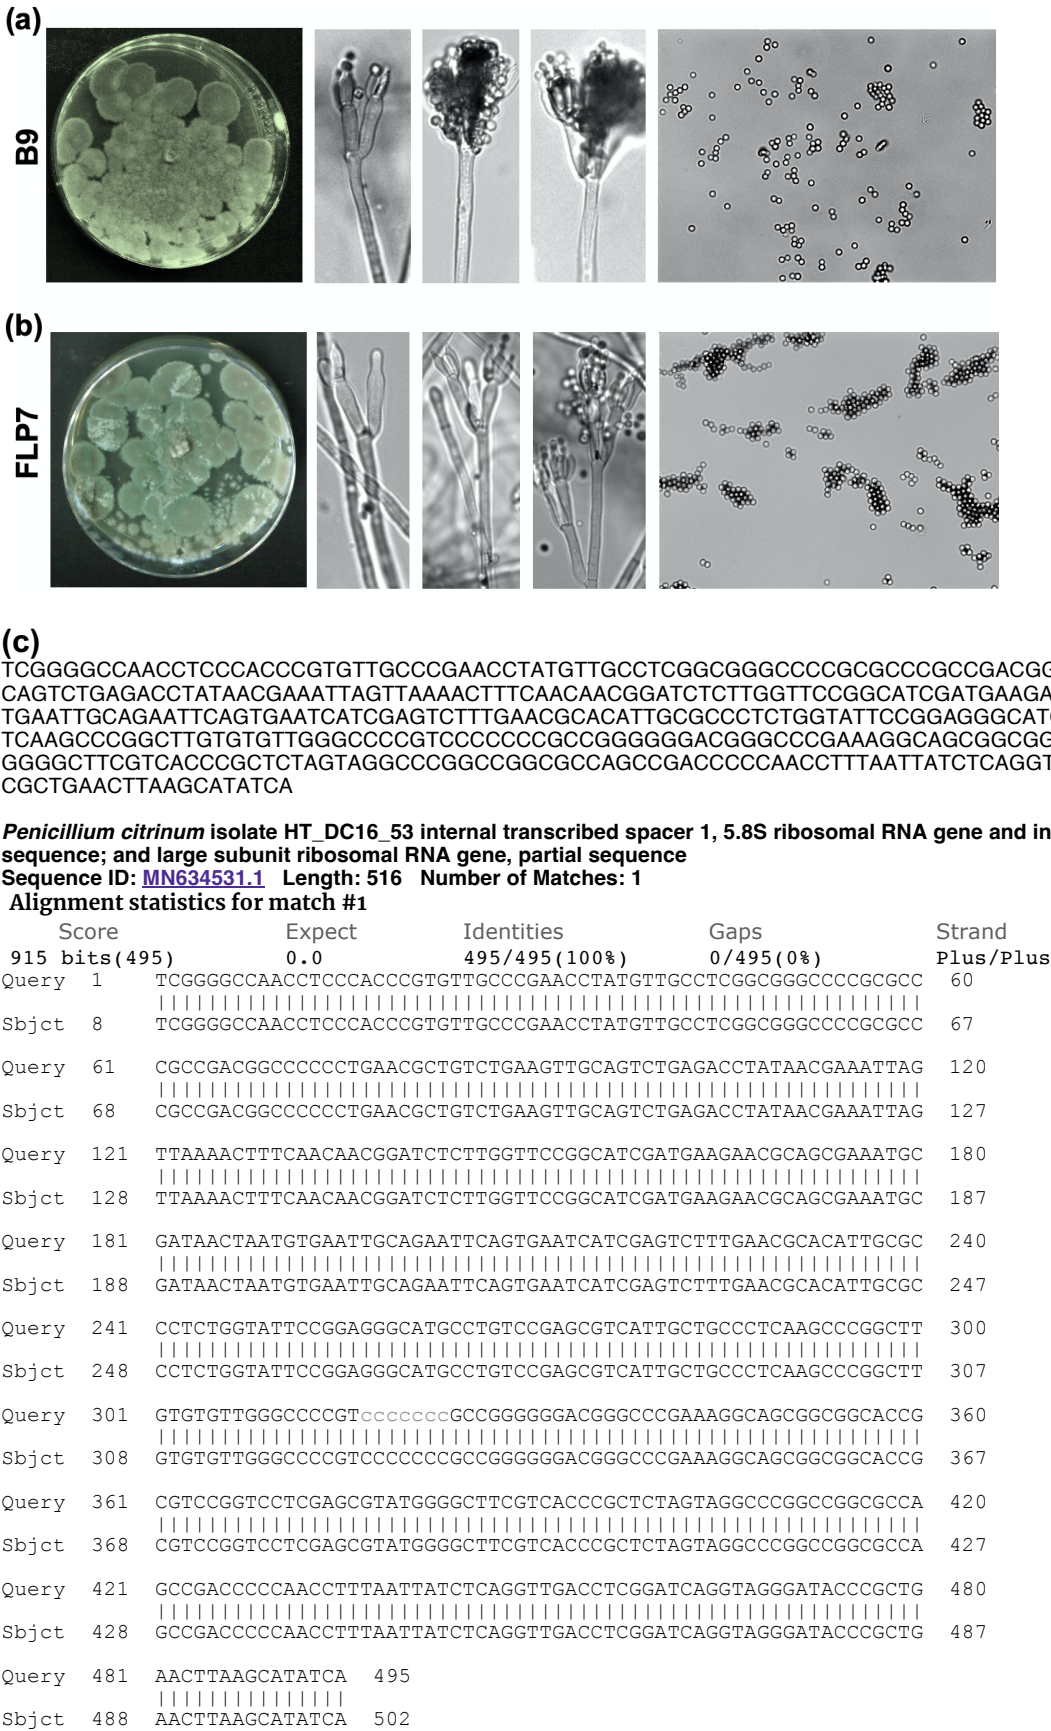

**Figure S1:** Morphometric, and taxonomic identification of beneficial fungal isolates (a) Colony morphology, and conidial characteristics for *P. citrinum* isolates B9, and FLP7 (b). (c) ITS sequence analysis and NCBI BLAST search-based confirmation of the identity of isolate B9 (and FLP7; not shown) as a strain belonging to *Penicillium citrinum*.

## Supplementary Figure S2:

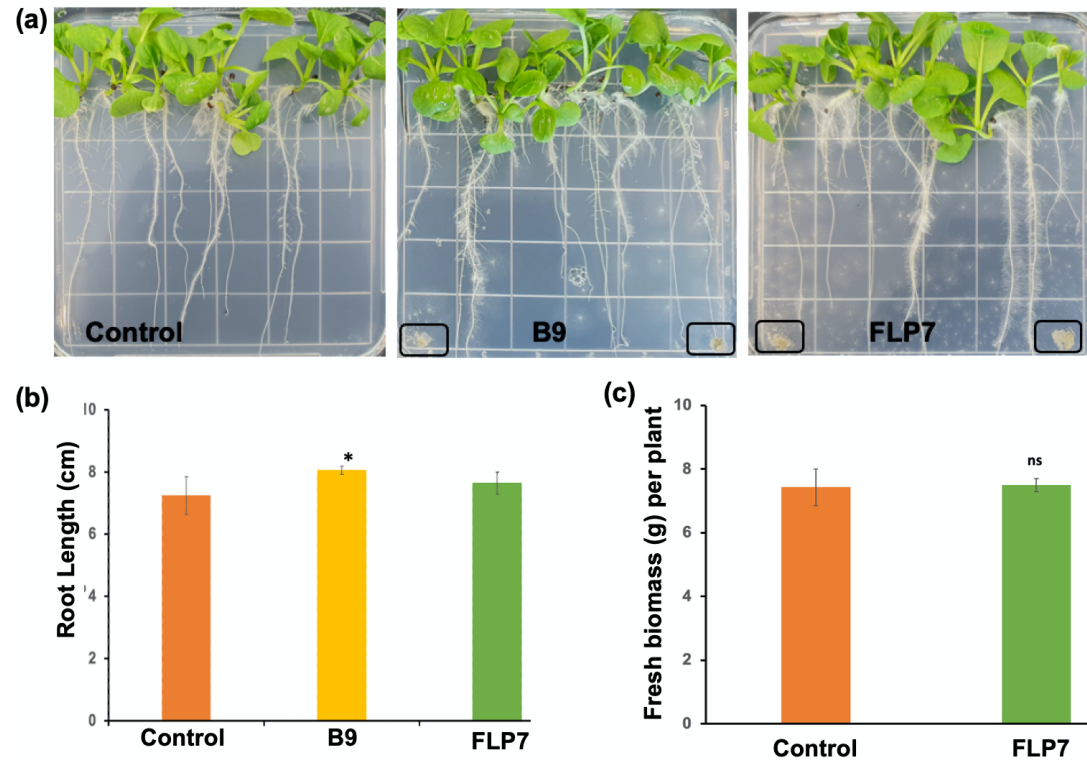

**Figure S2:** Effect of *P. citrinum* strain FLP7 (and/or B9) on the growth of Choy Sum (a) image showing growth of Choy Sum on MS medium inoculated without (control) or with the fungal plug from B9 or FLP7 strain (b) Average root length of seedlings at 10 days (c) the fresh biomass of plants grown in sterilized soil (21 days) and inoculated with FLP7 while transplanting the plants to the soil.

### Supplementary Figure S3

Total Ion Chromatograms (TIC) for the chemical standards for 2 important classes of phytohormones i.e Gibberellins and Cytokinins.

**(a)** Total ion chromatogram for Gibberellic acid standards (GA<sub>1</sub>, GA<sub>3</sub>, GA<sub>20</sub>, GA<sub>4</sub>)

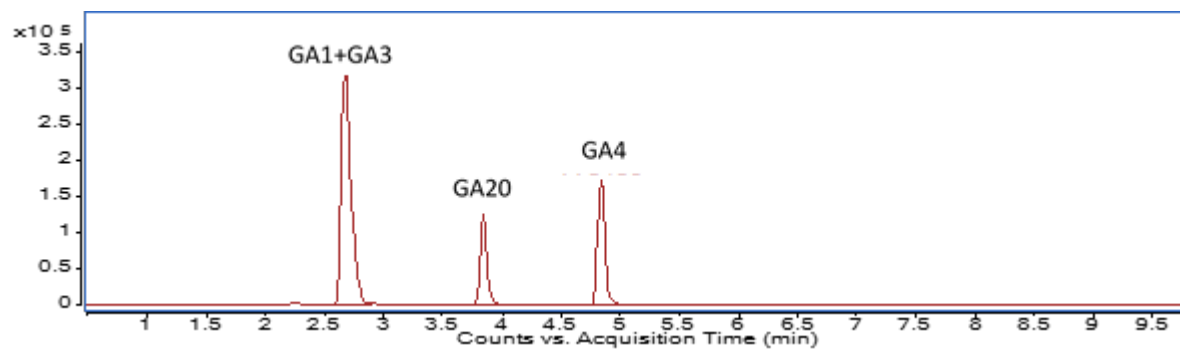

**(b)** Total ion chromatogram for trans-Zeatin and trans-Zeatin-riboside standards

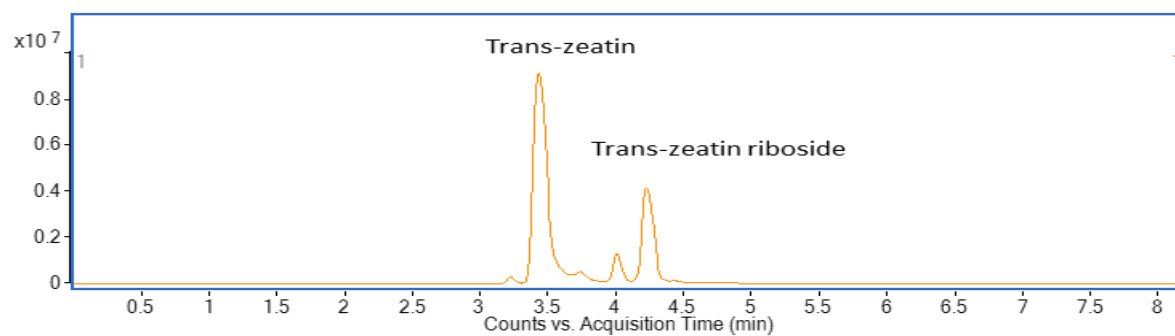

### Supplementary Figure S4a-d:

Multiple Reaction Monitoring (MRM) for Gibberellins and Cytokinins, together with the precursor ions, and fragment ion transitions, respectively.

**(a)** Multiple Reaction Monitoring (MRM) transitions for GA<sub>3</sub> showing precursor ion and fragment ion transitions

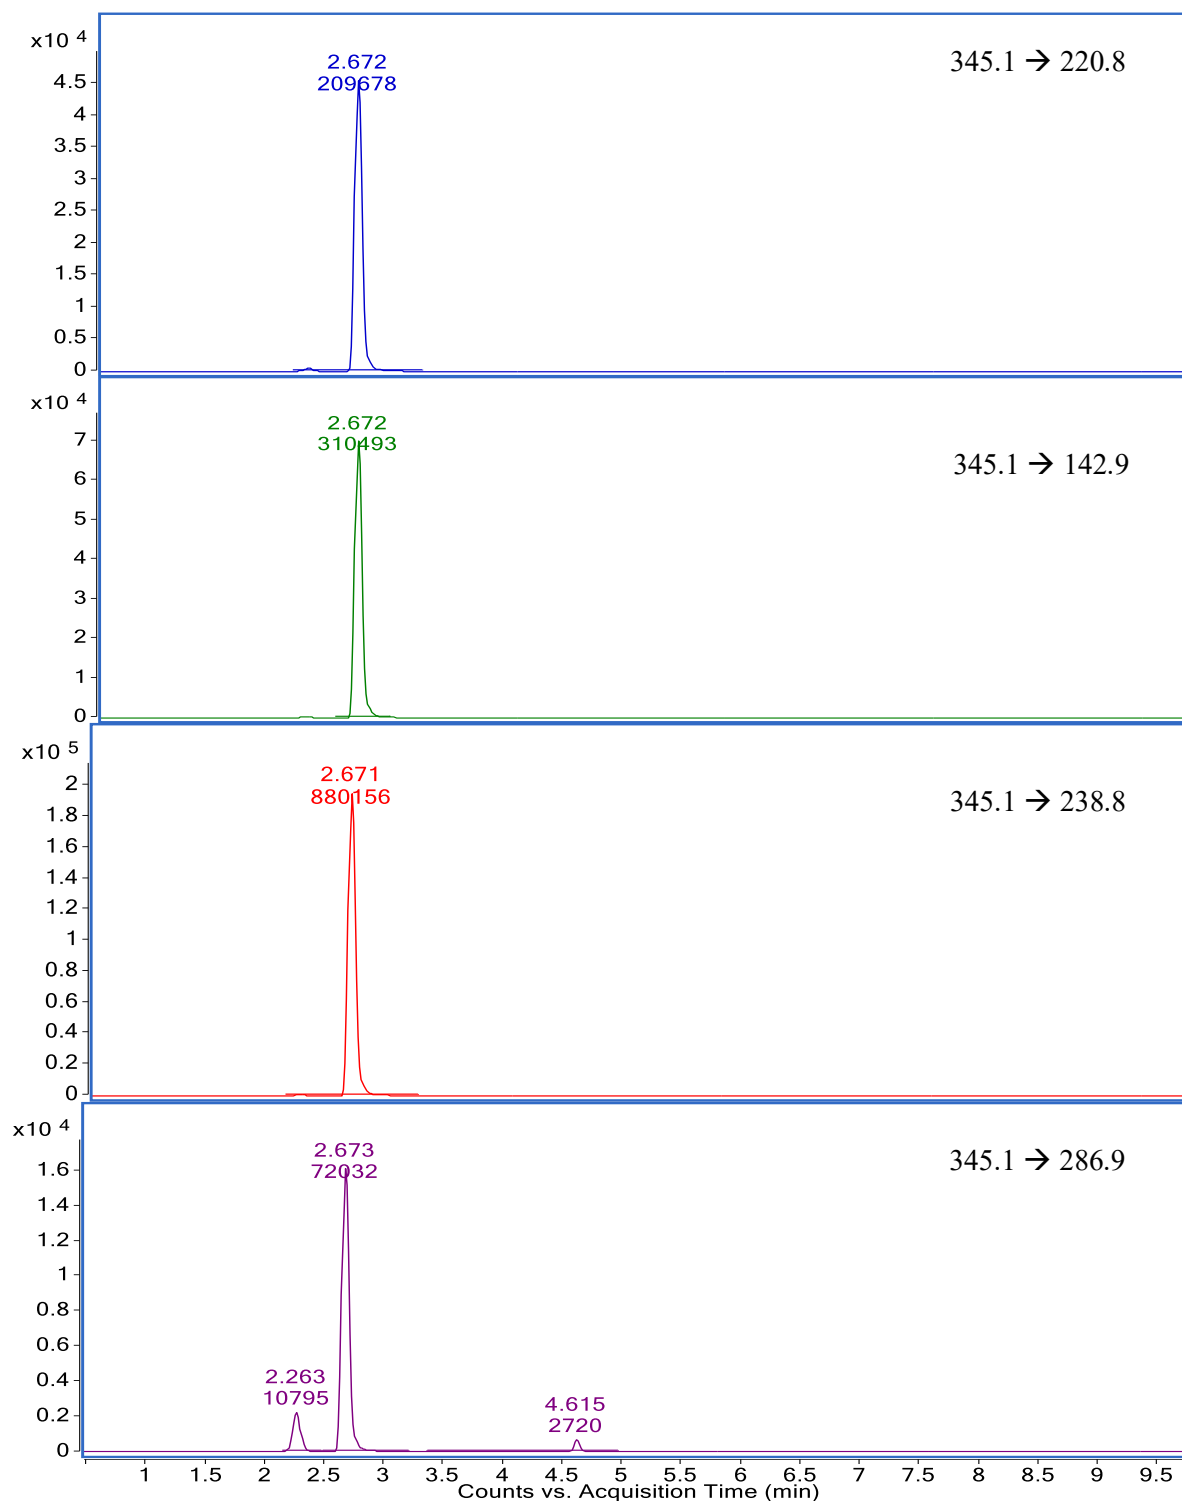

**(b)** MRM transitions for GA<sub>1</sub> showing precursor ion and fragment ion transitions

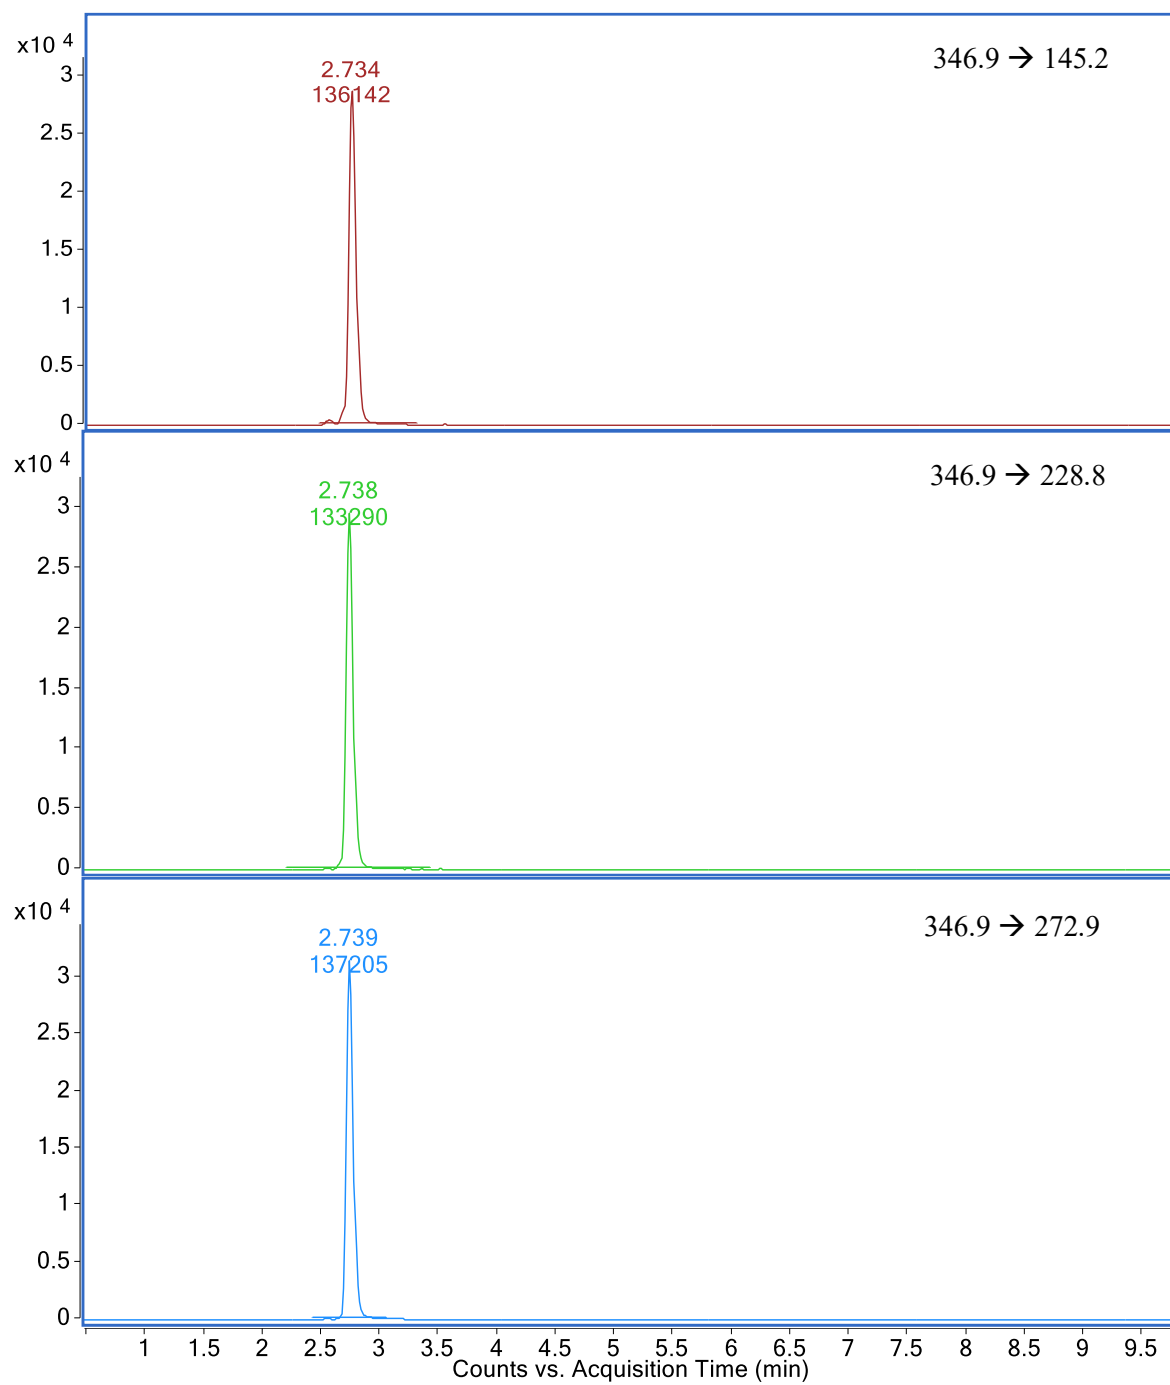

**(c)** MRM transitions for GA<sub>4</sub> showing precursor ion and fragment ion transitions

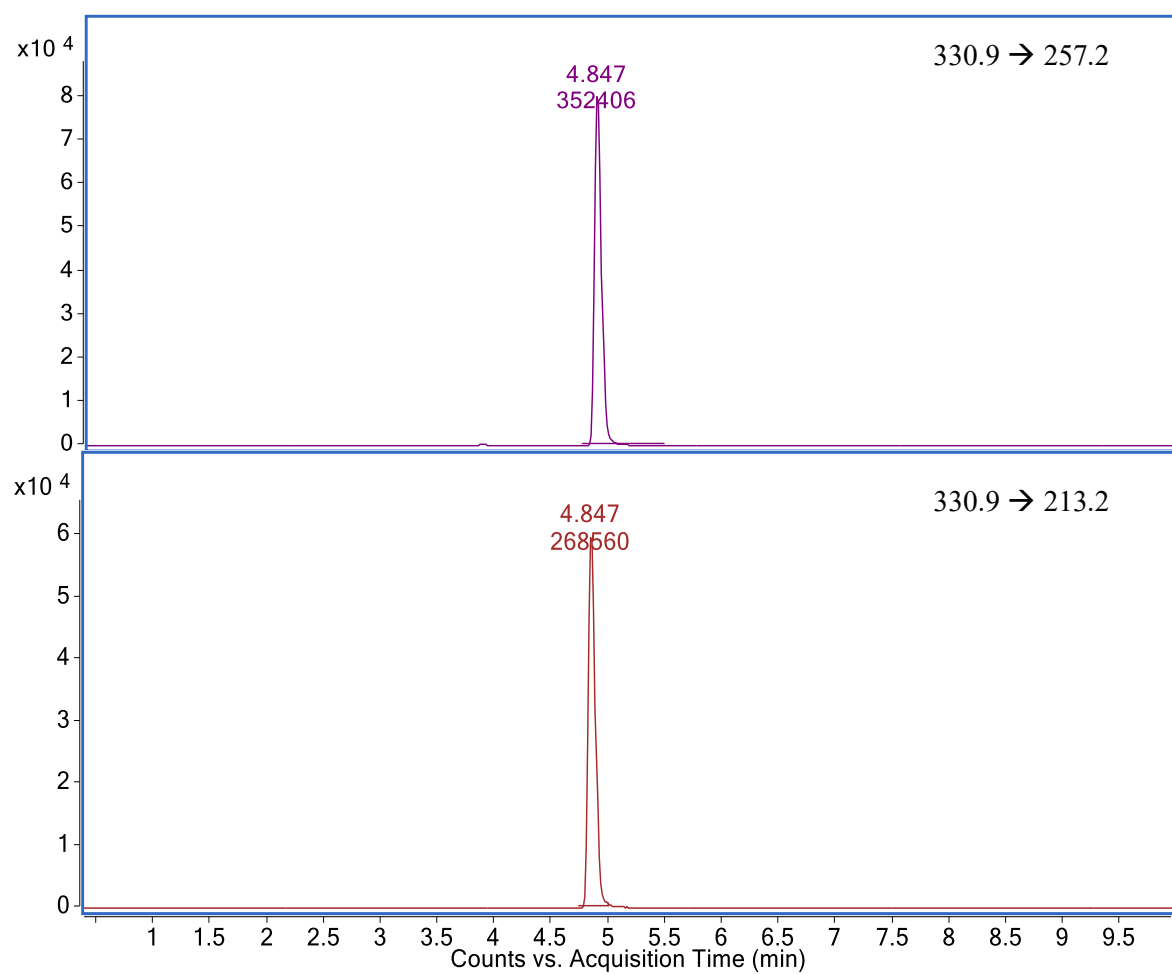

**(d)** MRM transitions for GA<sub>20</sub> showing precursor ion and fragment ion transitions

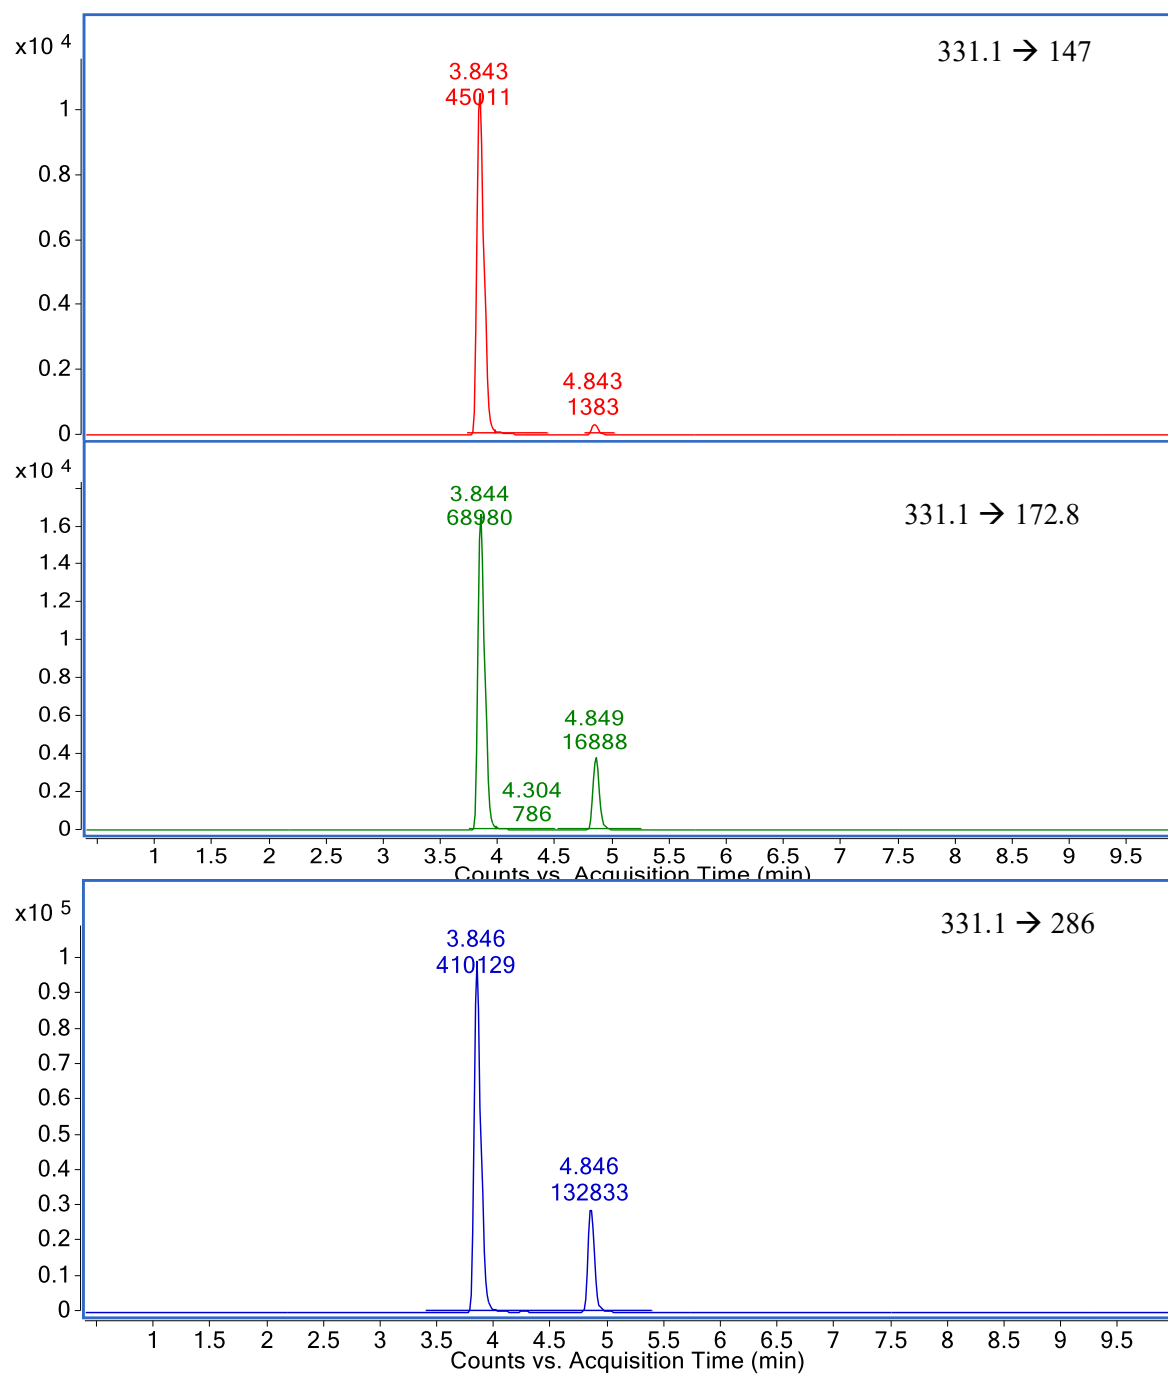

### Supplementary Figure S5a-c:

MRM transitions for Cytokinins showing the respective precursor ion and the fragment ion transitions.

#### (a) MRM transitions for trans-Zeatin-riboside showing precursor ion and fragment ion transitions

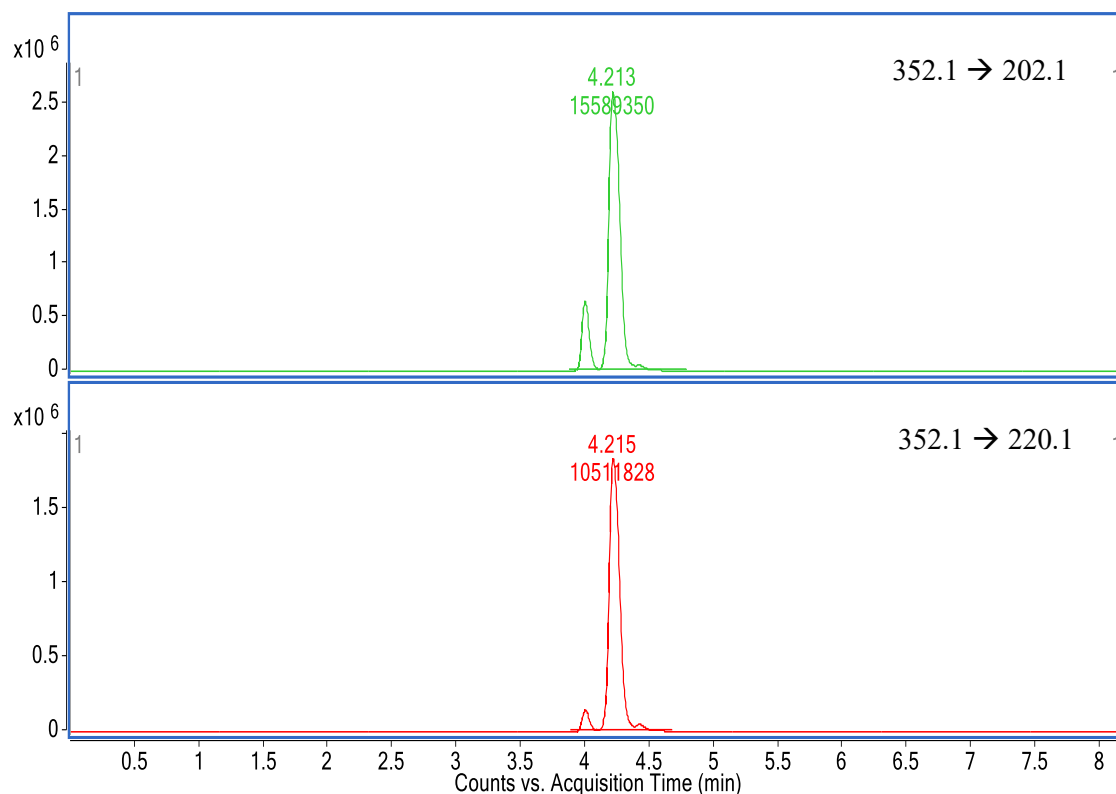

#### (b) MRM transitions for trans-Zeatin showing precursor ion and fragment ion transitions

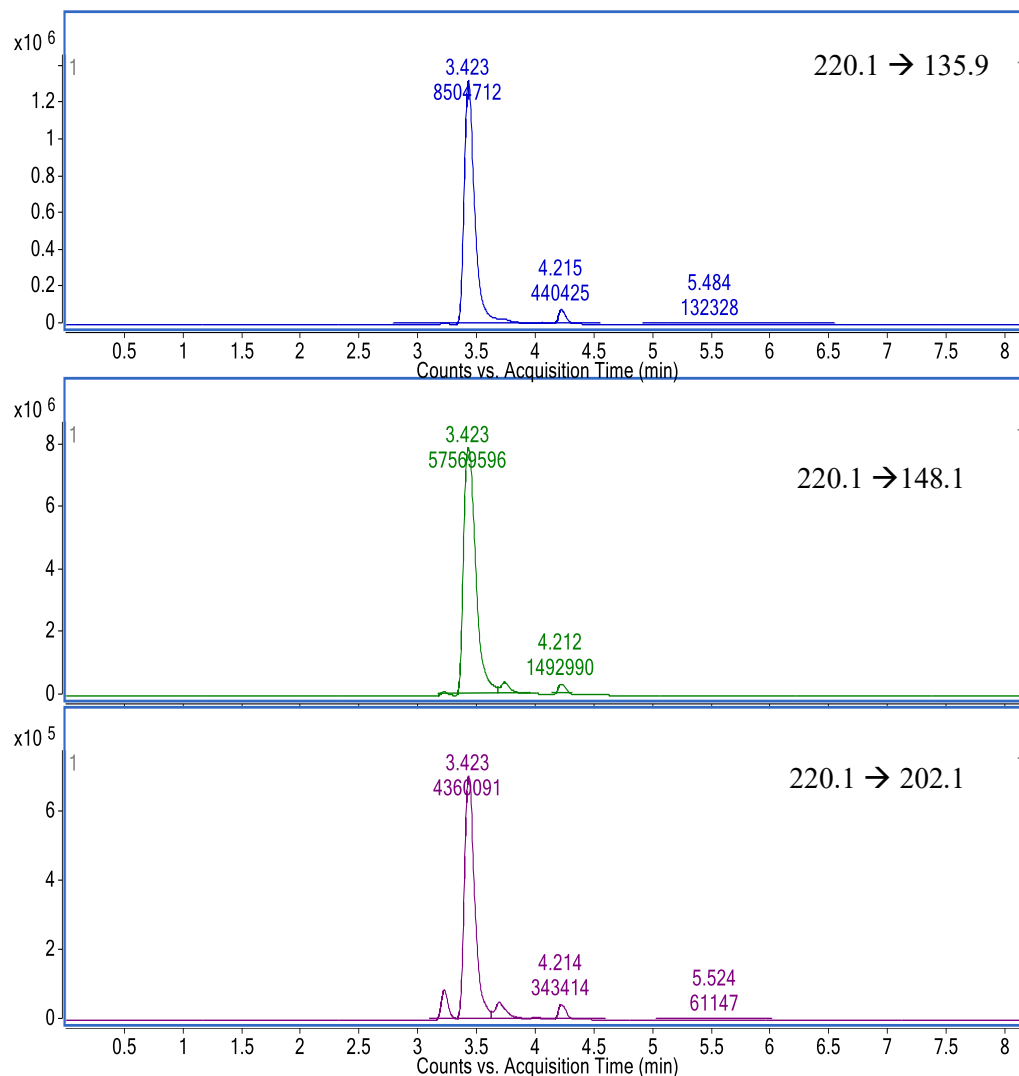



**(c)** Overlay Total Ion Chromatogram (TIC) between trans-Zeatin and trans-Zeatin-riboside standards (500 ppb each) and cell-free exudates of *P. citrinum* isolate B9 or FLP7 along with culture medium extract (Control; uninoculated). Trans-Zeatin and trans-Zeatin-riboside are present in culture filtrates of *P. citrinum* isolates (upper and lower panels) as well as in minor amounts in growth media (in blue).

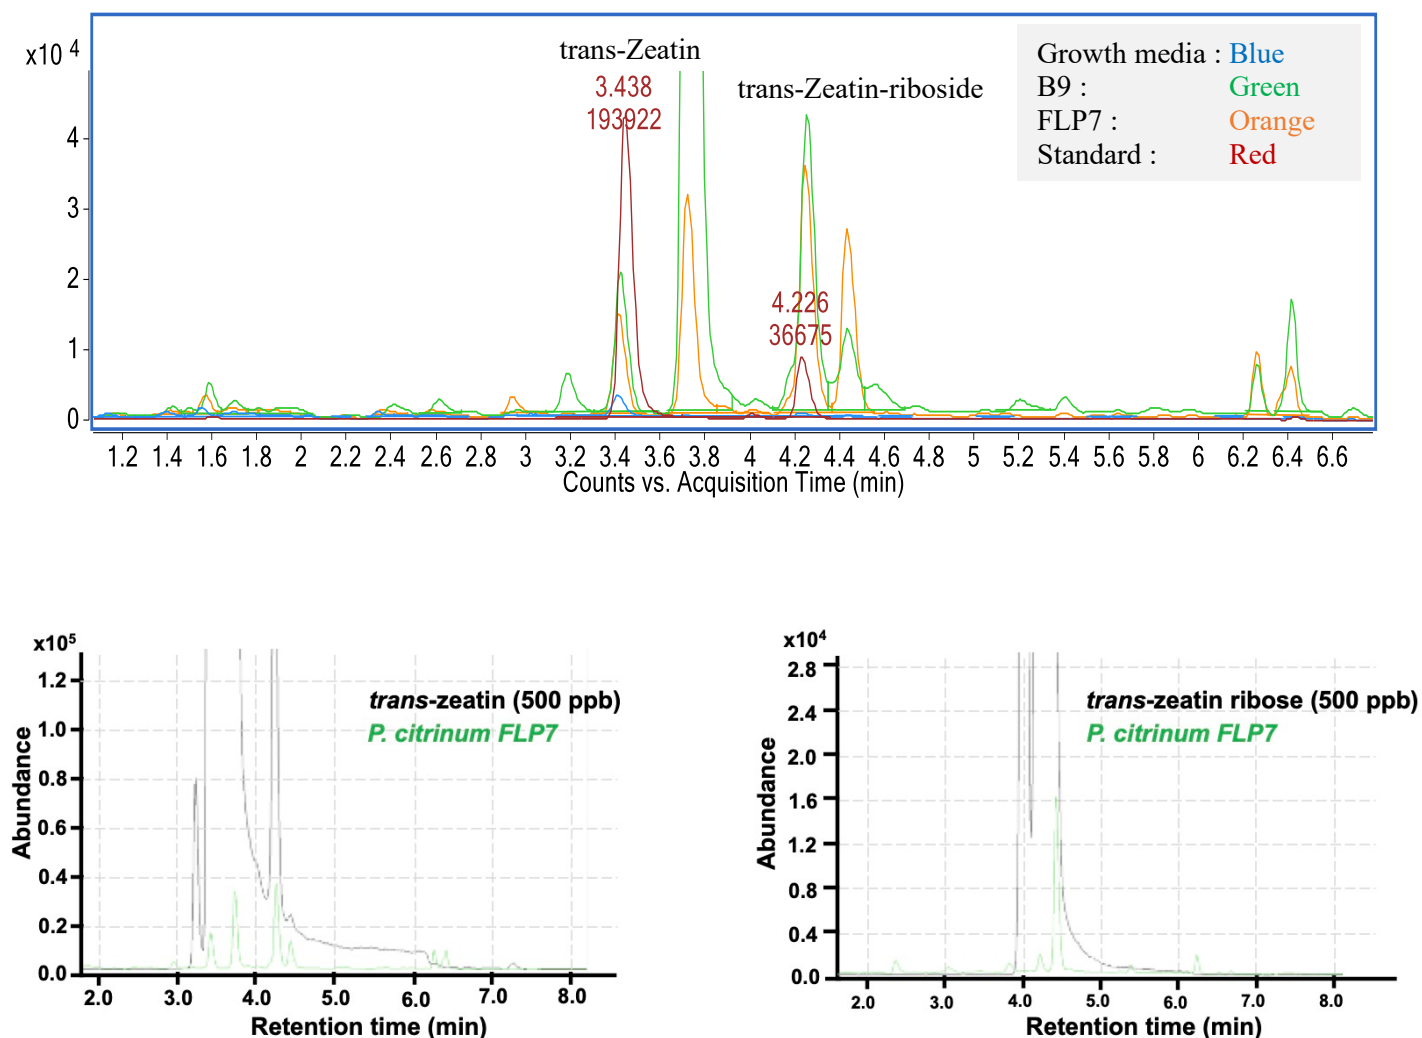

## Supplementary Figure S6a-b

Overlay total ion chromatogram (TIC) for cell-free exudate of *P. citrinum* FLP7 isolate showing three specific Gibberellin variants.

**(a)** Overlay total ion chromatogram (TIC) for two replicates of *P. citrinum* FLP7 cell-free culture filtrates showing the presence of GA<sub>1</sub> + GA<sub>3</sub>, and GA<sub>20</sub>.

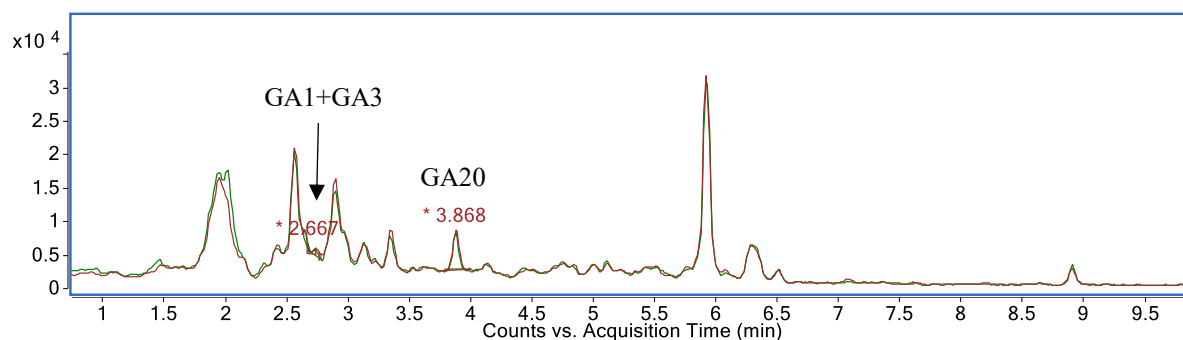

**(b)** Overlay total ion chromatogram (TIC) between GA<sub>20</sub> standard and the cell-free culture filtrates of FLP7 isolate. It shows presence of GA<sub>20</sub> in the culture filtrate.

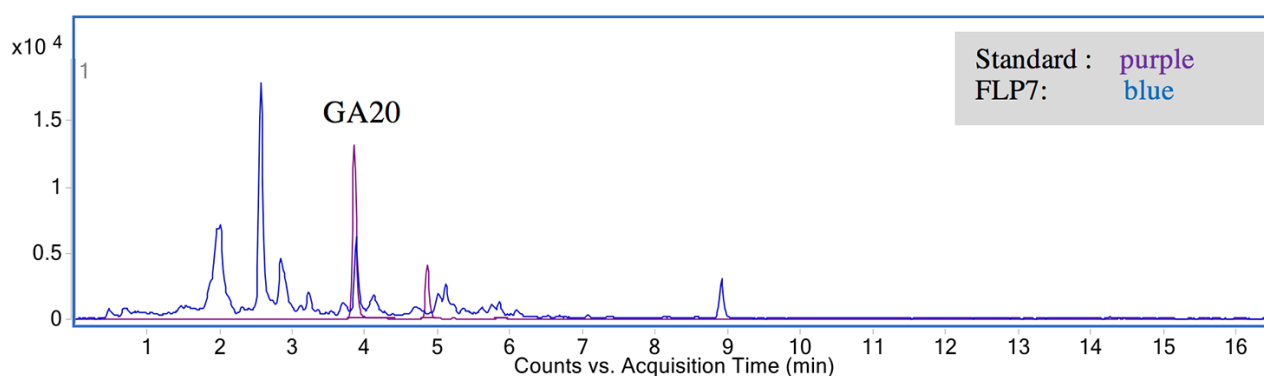

**TABLE S1:**

Oligonucleotide primers used in this study.

| Name    | Sequence (5'-3')       | References             |
|---------|------------------------|------------------------|
| ITS1    | TCCGTAGGTGAACCTGCGG    | (White et al., 1990)   |
| ITS4    | TCCTCCGCTTATTGATATGC   | (White et al., 1990)   |
| eGFP-F1 | TGGTGAGCAAGGGCGAGGAG   | This study             |
| eGFP-R1 | CGTCCATGCCGAGAGTGATCC  | This study             |
| Hyg-F1  | TCTCCGACCTGATGCAGCTCTC | This study             |
| Hyg-R1  | TACACAGCCATCGGTCCAGACG | This study             |
| LSU-F   | ACCCGCTGAACTTAAGC      | (Schoch et al., 2012)  |
| LSU-R   | TCCTGAGGGAAACTTCG      | (Schoch et al., 2012), |
| SSU-F   | GTAGTCATATGCTTGTCTC    | (Schoch et al., 2012)  |
| SSU-R   | CTTCCGTCAATTCCTTTAAG   | (Schoch et al., 2012)  |

**Table S2:**

Selected reaction monitoring conditions for protonated or deprotonated forms of the indicated plant hormones ([M+H]<sup>+</sup> or [M-H]<sup>-</sup>)

| Compound Name                     | Retention Time (RT) | Precursor Ion (Q1) | Product Ion (Q3) | Collision Energy | Polarity |
|-----------------------------------|---------------------|--------------------|------------------|------------------|----------|
| <b>Gibberellin GA<sub>1</sub></b> | 2.73                | 346.9              | 272.9            | 32               | Negative |
|                                   |                     | 346.9              | 228.8            | 30               |          |
|                                   |                     | 346.9              | 145.2            | 30               |          |
| <b>GA<sub>3</sub></b>             | 2.67                | 345.1              | 300.9            | 22               | Negative |
|                                   |                     | 345.1              | 238.8            | 22               |          |
|                                   |                     | 345.1              | 220.8            | 22               |          |
|                                   |                     | 345.1              | 142.9            | 22               |          |
| <b>GA<sub>20</sub></b>            | 3.84                | 331.1              | 286.9            | 30               | Negative |
|                                   |                     | 331.1              | 172.8            | 36               |          |
|                                   |                     | 331.1              | 147              | 30               |          |
| <b>GA<sub>4</sub></b>             | 4.84                | 330.9              | 257.2            | 30               | Negative |
|                                   |                     | 330.9              | 213.2            | 32               |          |
| <b>Cytokinin / Trans-zeatin</b>   | 3.42                | 220.1              | 135.9            | 16               | Positive |
|                                   |                     | 220.1              | 202.1            | 15               |          |
|                                   |                     | 220.1              | 148.1            | 15               |          |
| <b>Trans-zeatin riboside</b>      | 4.21                | 352.1              | 220.1            | 19               | Positive |
|                                   |                     | 352.1              | 202.1            | 19               |          |

**TABLE S3:**

List of volatile organic compounds differentially emitted during *P. citrinum*-derived growth promotion of Choy Sum. The VOCs were detected using headspace-solid phase microextraction (HS-SPME) coupled with Gas chromatography mass spectrometry. Uninoculated Prune agar medium served as a negative/mock control for comparison.

| Retention Time | Compound name                                                    | CAS number      |
|----------------|------------------------------------------------------------------|-----------------|
| 7.036          | Oxime-, methoxy-phenyl- <sub>2</sub>                             | NIST#: 222866   |
| 9.425          | 1-Octen-3-ol                                                     | CAS#: 3391-86-4 |
| 15.793         | Methyl salicylate                                                | CAS#: 119-36-8  |
| 27.569         | 1H-2-Indenone,2,4,5,6,7,7a-hexahydro-3-(1-methylethyl)-7a-methyl | CAS#: 5413-60-5 |
| 19.505         | Decane, 2,3,5,8-tetramethyl-                                     | CAS#: 124-18-5  |
| 21.604         | Longifolene-(V4)                                                 | CAS#: 475-20-7  |
| 16.89          | 2-Allyl-4-methylphenol                                           | CAS#: 6628-06-4 |
